# Supplementary material for: Insights into a Multidrug Resistant Escherichia coli Pathogen of the Globally Disseminated ST131 Lineage: Genome Analysis and Virulence Mechanisms
Source: PLoS One. 2011 Oct 28;6(10):e26578. doi: 10.1371/journal.pone.0026578 (PMC3203889; doi:10.1371/journal.pone.0026578)
Supplement: Table S1 — Features of the specific regions from the EC958 genome noted in Figure 1 . (XLSX) [file pone.0026578.s001.xlsx]

## Sheet: EC958 supplementary Table 1
Regions	Description/Notable features	Length(bp)1	Insertion relative to K12-MG16551	Corresponding region in K12-MG1655	Boundaries in EC9582
Flag2	Variable region; Lateral flagellar locus	38135	Within lfhA (250061)	Contiguous	3bp direct repeat in EC958
GI-thrW	Genomic island; type I mod/res	10812	Within tRNA-thrW (262180)	40,873bp cryptic prophage CP4-6 and downstream yagP-yagT (261081..302053)	54bp direct repeat in EC958
ROD1	Region of difference; contains integrase	11585	Within hokD (606844)	1957bp region encompassing InsL IS within hokD and 3' end of entD (606845..608801)	No repeats
prophage1	Prophage;	38661	Downstream of serS (939965)	Contiguous	19bp direct repeat in EC958
prophage2	Prophage;	37052	Within ycaL (959495)	Contiguous	6pb direct repeat in EC958
prophage3	Prophage;	48679	Within icd (1195597)	16,103bp cryptic prophage e14 and downstream icdC-elbA (1195598..1211700)	164bp direct repeat in EC958
ROD2	Region of difference; contains integrases; genes for sugar transport/metabolism	26379	Within dhaR (1252201)	3653bp region encompassing 3' end of dhaR and complete ycgV cds (1252202..1255854)	No repeats
prophage4	Prophage;	48818	Within ompW (1312684)	1771bp region between 3' end of ompW and 5' end of trpA (1312685..1314455)	142bp direct repeat in EC958
prophage5	Prophage;	43048	Within tRNA-leuZ (1989769)	Contiguous	124bp direct repeat in EC958
prophage6	Prophage;	40458	Within tRNA-serU (2041491)	Contiguous	61bp direct repeat in EC958
HPI	Genomic island; High Pathogenicity Island	31448	Within tRNA-asnT (2042648)	588bp region encompassing 5' end of yeeJ (2042649..2043236)	No repeats
cryptic phage	Prophage; similar to K12 cryptic prophage CP4-44 at 5' and 3' ends	41238	Variant region present in K12	Syntenic with 11,678bp cryptic prophage CP4-44 (2065378..2077055)	No repeats
O-antigen1	Variable region;	10961	Variant region present in K12	Syntenic with region encompassing wbbL to rfbB (2099310..2111315)	No repeats
prophage7	Prophage;	11921	Within tRNA-argW(2464406)	10,215bp cryptic prophage CPS-53 (2464407..2474621)	20p direct repeat in EC958
RatA-like	Variable region;	12106	Within xseA(2633465)	440bp region encompassing 3' end of xseA and 3' end of der (2633465..2633904)	No repeats
Type VI	Variable region; Type VI secretion locus	46909	Downstream of metV(2945708)	73bp region between metV and amiC(2945708..2945780)	No repeats
GI-pheV	Genomic island; sat autotransporter; iutA and iha ferrisiderophore receptors	75789	Within tRNA-pheV(310444)	Contiguous	66bp direct repeats in EC958
capsule	Variable region;	17224	Between pheV and yghD(3108512..3108624)	114bp region between pheV and 3' end of yghD (3108512..3108624)	No repeats
O-antigen2	Variable region	16549	Variant region present in K12	Syntenic with region encompassing rfaD to coaD (3791962..3808356)	No repeats
GI-SelC	Genomic island; dr/afa type chaperone-usher fimbrial locus	66671	Immediately adjacent to tRNA-selC (3834339)	1907bp region encompassing region between tRNA-selC and yicL (3834340..3836246)	No repeats
ROD3	Region of difference; picU-like autotransporter; chaperone-usher fimbrial locus	16099	Within yjdI and yjdJ(4345000..4350380)	280bp region encompassing 3' end of yjdI and 5' end of yjdJ (4350073..4350353)	26bp direct repeats in EC958 (appear to be associated with suspected flanking IS elements)
GI-leuX	Genomic island; fec locus	76826	Immediately adjacent to tRNA-leuX (4494512)	38,108bp region encompassing region between tRNA-leuX and yjhZ including KpLE2 phage-like element (4494512....4532619)	No repeats
Footnotes:
1	Length in EC958 draft assembly, including within-scaffold gaps with size estimated by GS assembler; GI-leuX contains one between-scaffold gap.
2	Single nucleotide positions indicate insertion between n and n+1 on the forward strand; prophage4 and prophage5 are encoded on reverse strand.
